# Supplementary material
Source: PubMed Central journal article supplement (PMC6784754)
Supplement: jama-322-1371-s004.pdf [file jama-322-1371-s004.pdf]

# Data Sharing Statement

**Aboumatar. Effect of a Hospital-Initiated Program Combining Transitional Care and Long-term Self-management Support on Outcomes of Patients Hospitalized With Chronic Obstructive Pulmonary Disease. *JAMA*. Published October 8, 2019. 10.1001/jama.2019.11982**

## Data

**Data available:** No

## Additional Information

**Explanation for why data not available:** Data summaries will be shared upon request from principal investigator at the time of acceptance of publication of the study main findings. These summaries will be available to others without cost. The individual-level data set includes demographic characteristics, the various health conditions that each participant has, and a detailed account with dates of all the hospitalizations and ED visits, and reasons for those. Removal of all identifiers, to protect the identities of participants, will require significant time and costs.
